# Supplementary material for: Essential autoproteolysis of bacterial anti-σ factor RsgI for transmembrane signal transduction
Source: PubMed Central journal article supplement — Sci Adv. 2023 Jul 7;9(27):eadg4846. doi: 10.1126/sciadv.adg4846 (PMC10328401; doi:10.1126/sciadv.adg4846), 2023-07-07
Supplement: sciadv.adg4846_sm.pdf [file sciadv.adg4846_sm.pdf]

Supplementary Materials for  
**Essential autoproteolysis of bacterial anti- $\sigma$  factor RsgI for transmembrane  
signal transduction**

Chao Chen *et al.*

Corresponding author: Yingang Feng, fengyg@qibebt.ac.cn

*Sci. Adv.* **9**, eadg4846 (2023)  
DOI: 10.1126/sciadv.adg4846

**This PDF file includes:**

Figs. S1 to S10  
Tables S1 to S7

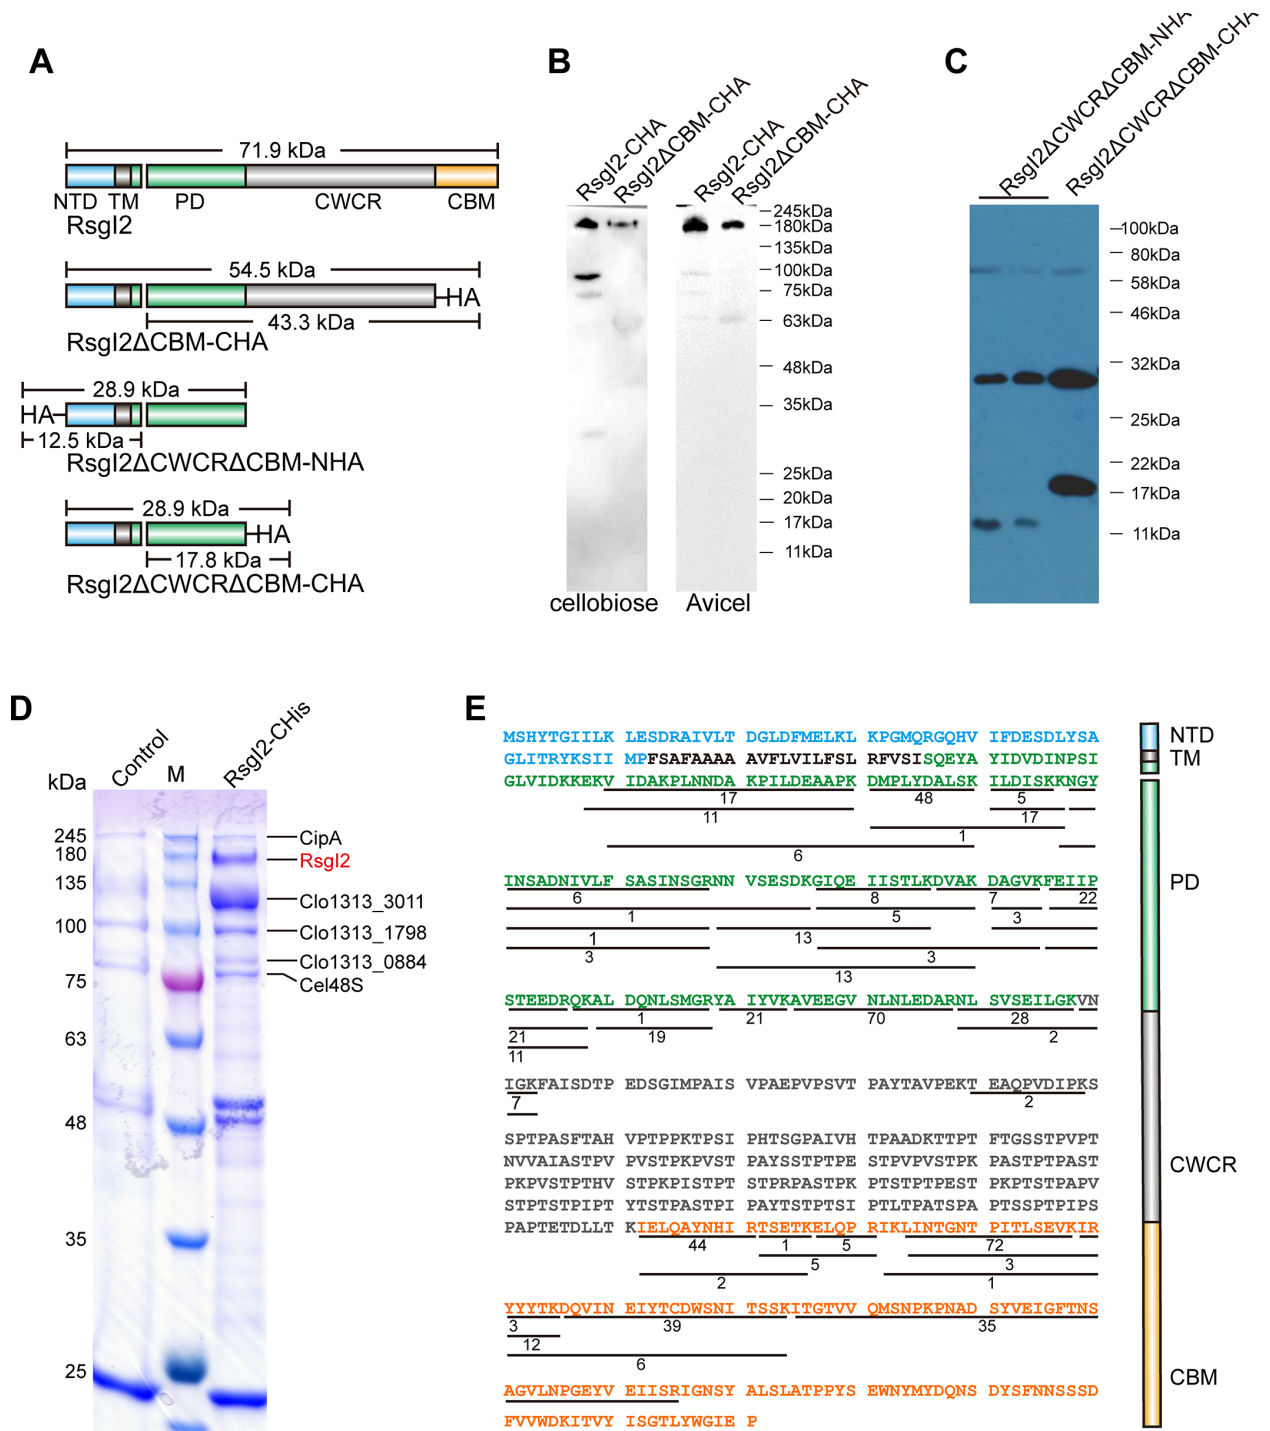

**Fig. S1. Identification of RsgI2 expressed in *Clostridium thermocellum*.** (A) Schematic representation of the composition of RsgI2 and its truncation mutants. (B-C) The expression of RsgI2 truncation mutants in *C. thermocellum*. The HA-tagged RsgI2 lacking the carbohydrate-binding domain (B) or lacking both the cell wall-crossing region (CWCR) and the CBM (C) were expressed in the  $\Delta rsgI2$  strain with cellobiose or Avicel as the carbon source, and the RsgI2 components were detected by Western blotting using an anti-HA-tag antibody. (D) SDS-PAGE analysis of the purified RsgI2-CHis. The mutants  $\Delta rsgI2$  (control) and the  $\Delta rsgI2$  bearing a

plasmid to express RsgI2 with a C-terminal His tag (RsgI2-CHis) were cultured in media with Avicel as the carbon source. RsgI2-CHis was purified using the following procedure: After ultrasonication treatment of the cells, the lysate was centrifuged at 5,000 g, and the cell debris were dissolved in sample buffer (50 mM Tris-HCl, 500 mM NaCl, 30 mM imidazole, pH 8.0) containing 8 M urea. After ultracentrifugation at 160,000 g for 60 min, the pellet was dissolved in the sample buffer containing 1% n-dodecyl  $\beta$ -D-maltoside (DDM) and ultracentrifuged again at 160,000 g for 60 min. After the addition of 8 M urea, the supernatant fluids were applied to a Ni<sup>2+</sup> affinity column. The proteins were eluted with the sample buffer containing 500 mM imidazole and 8 M urea. The eluted proteins were detected on SDS-PAGE, and the six designated protein bands in the range of 75-250 kDa were selected for mass spectroscopy identification. The identified proteins with the highest scores are shown in the figure. (E) The peptides identified by mass spectroscopy for the band at 180 kDa. Each detected peptide segment and its matching times are indicated.

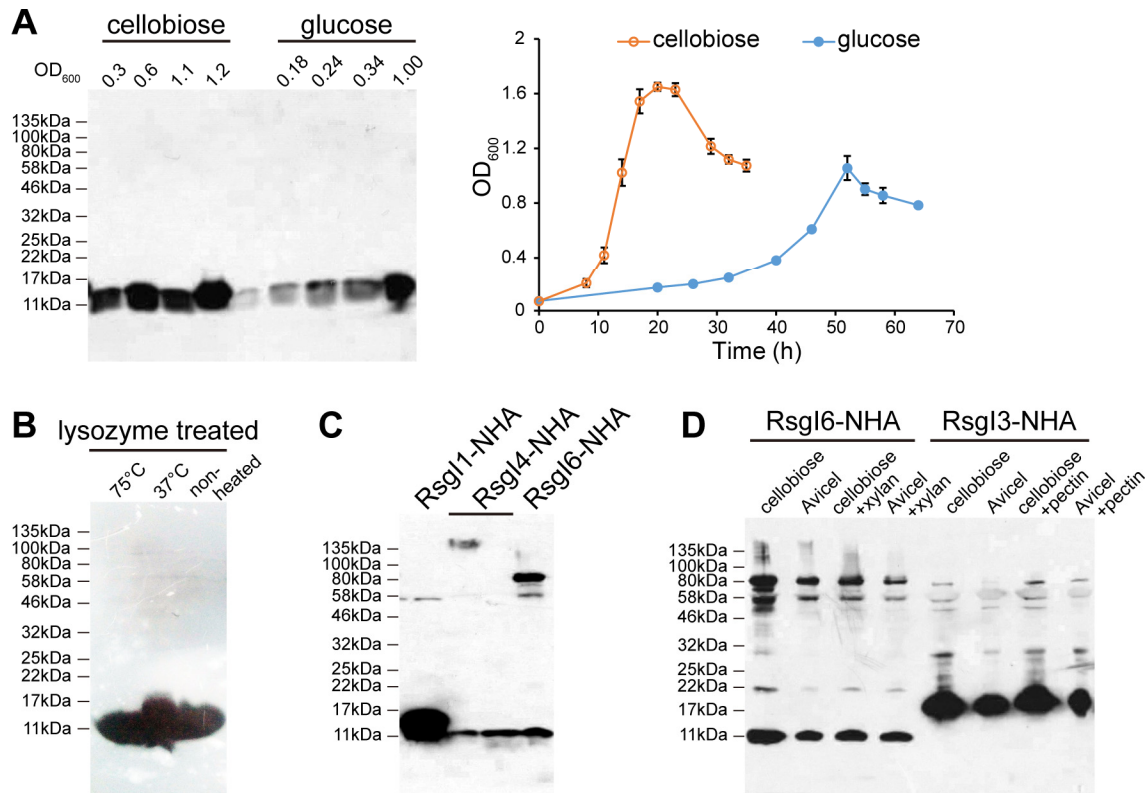

**Fig. S2. Identification of the cleavage of different RsgIs in *C. thermocellum*.** (A) The cleavage is independent of the carbon source and growth stage. The  $\Delta rsgI2::rsgI2-NHA$  strain was cultured with cellobiose or glucose as the carbon source and sampled at different growth stages. Growth curves are shown on the right for reference. (B) Samples of  $\Delta rsgI2::rsgI2-NHA$  cultured on cellobiose were lysed by lysozyme and then treated at different temperatures in a water bath. (C) The cleavages were observed in the N-terminal HA-tagged RsgIs expressed in *C. thermocellum* DSM1313 cultured with cellobiose as the carbon source. (D) The cleavage of RsgI6-NHA and RsgI3-NHA expressed in *C. thermocellum* with different carbon sources. All the targeted proteins were detected by Western blotting using an anti-HA-tag antibody.

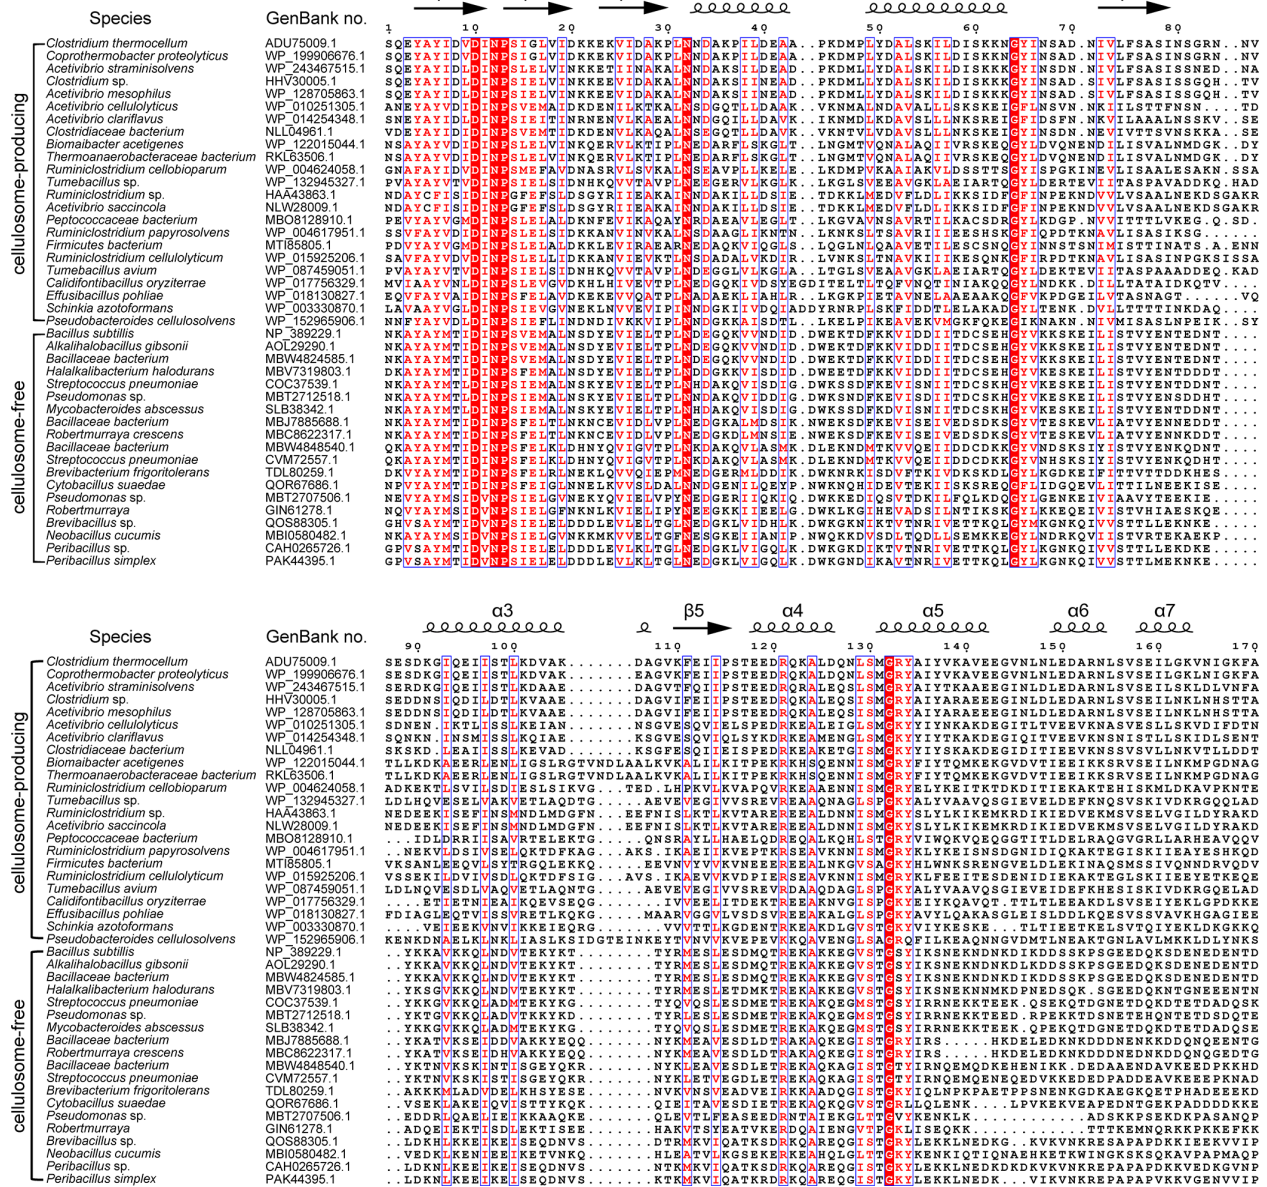

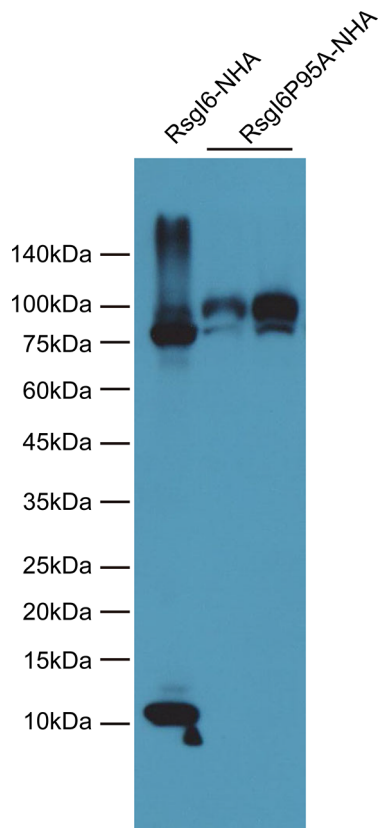

**Fig. S4. The P95A mutation blocks the cleavage of RsgI6 in *C. thermocellum*.** DSM1313::*rsgI6-NHA* and DSM1313::*rsgI6P95A-NHA* were cultured with cellobiose as the carbon source and detected by Western-blot analysis using the anti-HA-tag antibody.

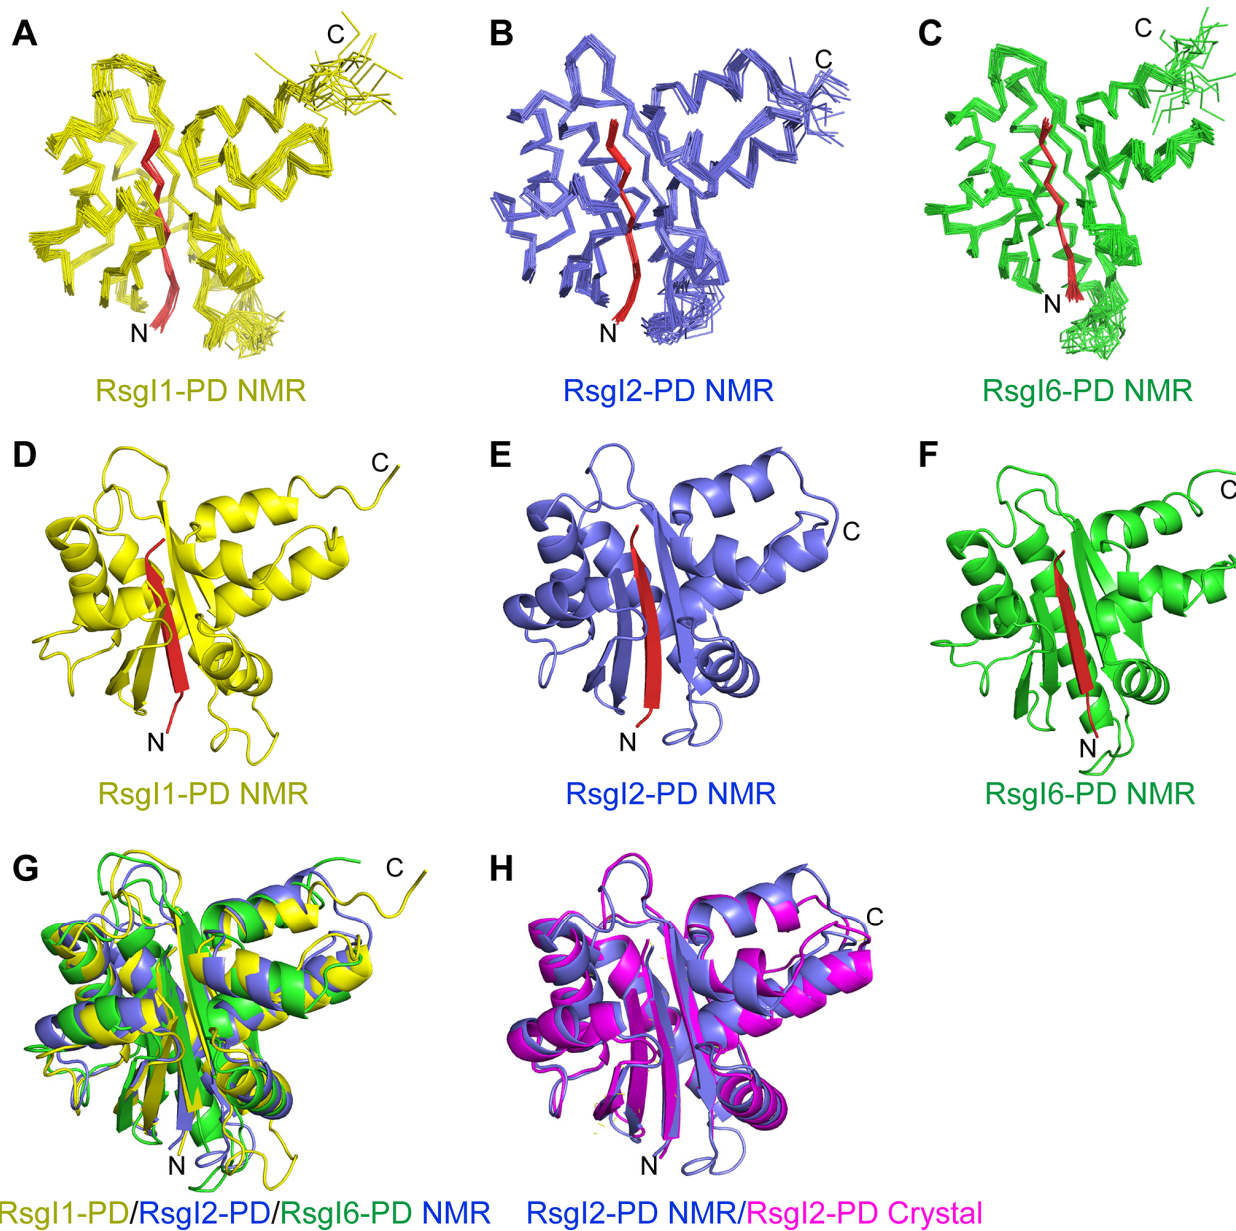

**Fig. S5. NMR structures of RsgI-PDs.** (A-F) The backbone ensemble of 20 structures (A-C) and ribbon representation of the first structure (D-F) of RsgI1-PD (A and D), RsgI2-PD (B and E), and RsgI6-PD (C and F). The disconnected  $\beta 1$  strands are shown in red in Panels A-F. (G) Superposition of the NMR structures of RsgI1-PD, RsgI2-PD, and RsgI6-PD. (H) Superposition of the NMR (blue) and crystal (purple) structures of RsgI2-PD.

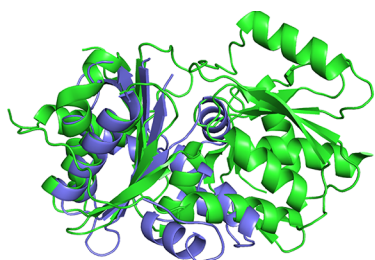

PDB: 4HJH-A  
Z score: 6.0 RMSD: 3.3

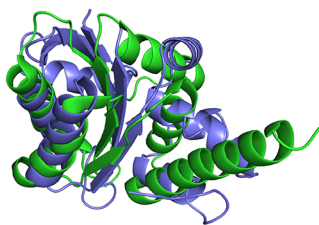

PDB: 3GDW-B  
Z score: 5.0 RMSD: 3.7

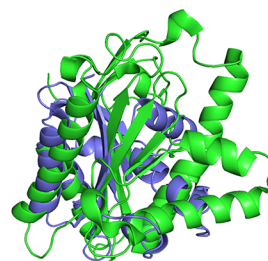

PDB: 2FGY-A  
Z score: 5.0 RMSD: 3.2

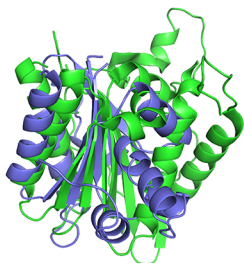

PDB: 7R5Y-E  
Z score: 5.0 RMSD: 3.4

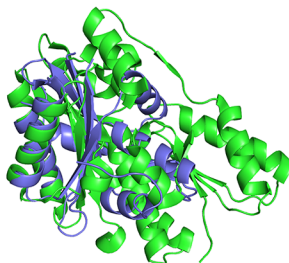

PDB: 3NYI-B  
Z score: 4.9 RMSD: 3.2

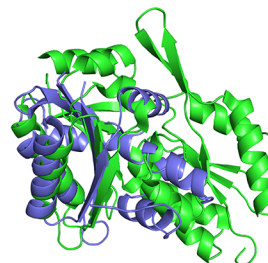

PDB: 3EGL-B  
Z score: 4.8 RMSD: 2.9

**Fig. S6. Structure comparison of RsgI2-PD with similar structures identified by the Dali server.** The six highest-scored structures and RsgI2-PD are shown in green and slate blue, respectively.



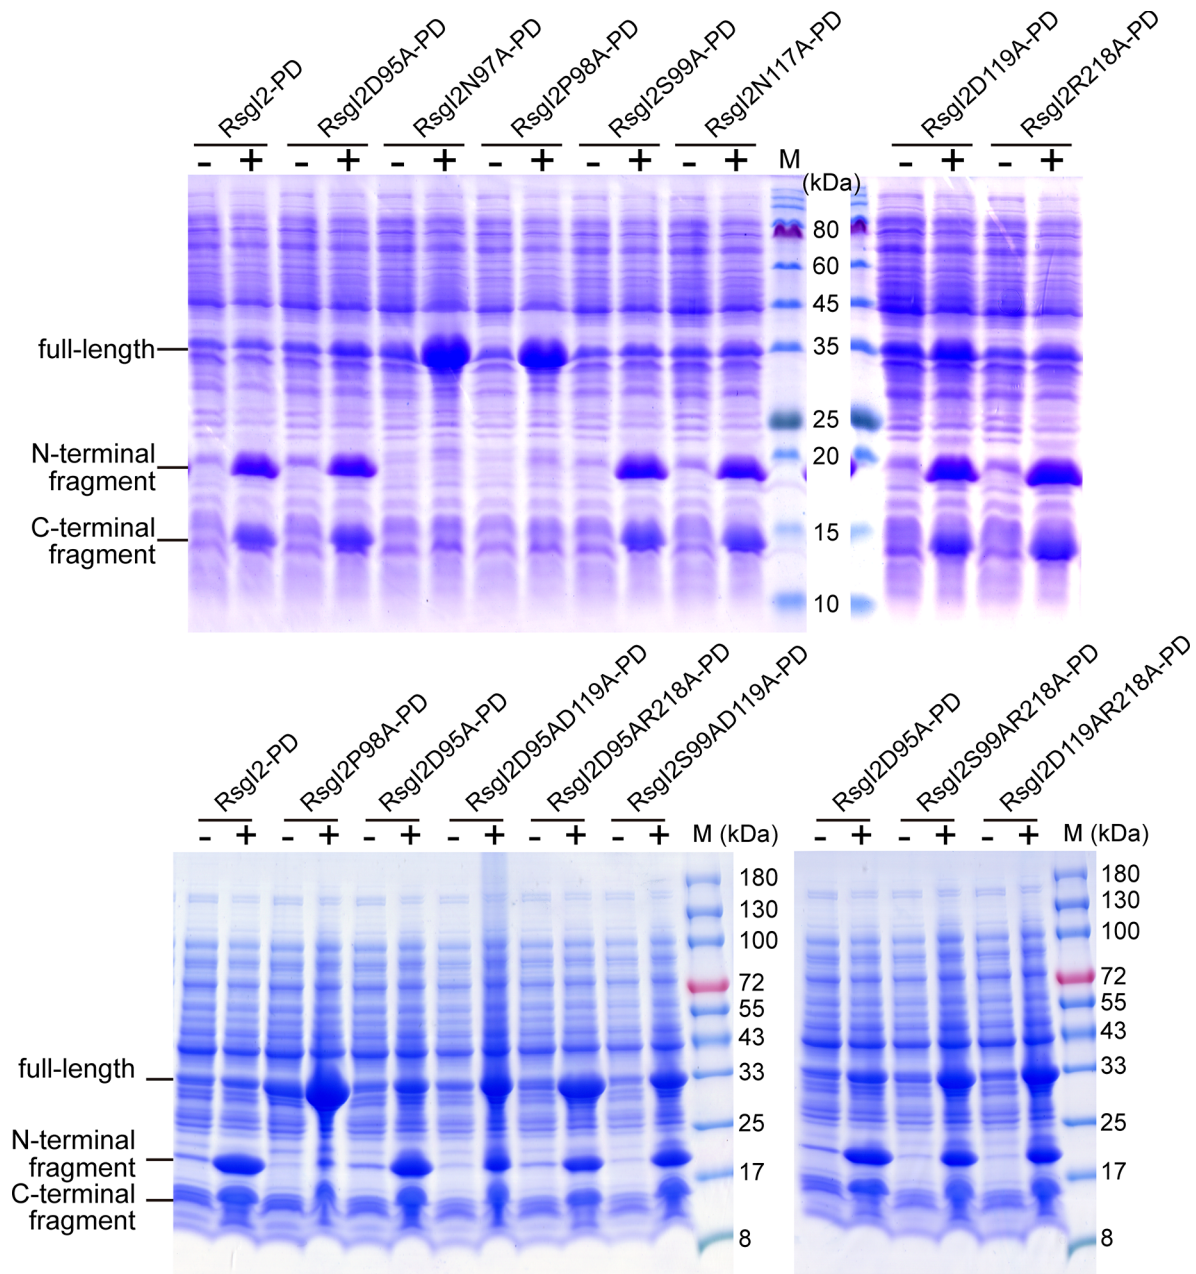

**Fig. S7. Mutagenetic analysis of the conserved residues surrounding the cleavage site in SMT3-RsgI2-PD.** The *Escherichia coli* BL21(DE3) cells expressing various mutants before (-) and after (+) induction were analyzed by SDS-PAGE.

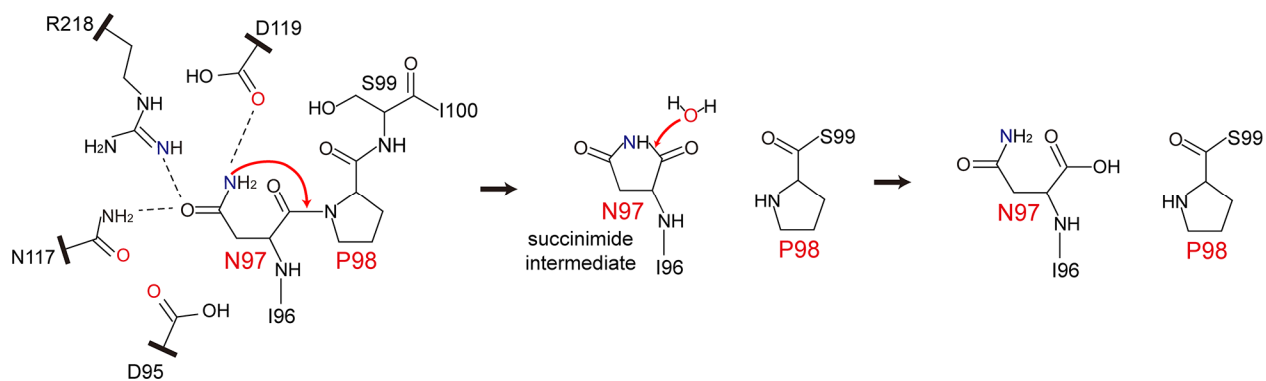

**Fig. S8. Proposed autocleavage mechanism of RsgI2.** Asn42 is polarized by one or more adjacent residues and the side chain performs a nucleophilic attack on its peptide bond, resulting in the autocleavage with a succinimide intermediate which is further opened by hydrolysis.

### Xyn10Z (Clo1313\_2635)

MSRKLFSVLL VGLMLMTSLL VTISSTSAAS LPTMPPSGYD QVRNGVPRGQ VVNISYFSTA TNTTRPARVY  
LPPGYSKDKK YSVLYLLHGI GGSENDWFEG GGRANVIADN LIAEGKIKPL IIVTPNTNAA GPGIADGYEN  
FTKDLLNSLI PYIESNYSVY TDREHRAIAG LSMGGGQSFN IGLTNLDKFA YIGPISAAPN TYPNERLFPD  
GGKAAREKLL LLFIACGTND SLIGFGQRVH EYCVANNINH VYWLIQGGH DFNVWKPGLW NFLQMADEAG  
LTRDGNTVPV TPSPKPANTR IEAEDYDGIN SSSIIEIIGVP PEGGRGIGYI TSGDYLVIKYS IDFGNGATSF  
KAKVANANTS NIELRLNGPN GTLIGTSLVK STGDWNTYEE QTCSISKVTG INDLYLVFKG PVNIDWFTFG  
VESSSTGLGD LNGDGNINSS DLQALKRHLL GISPLTGEAL LRADVNRSGK VDSTDYSVLK RYILRIITEF  
PGQGDVQTPN PSVTPTQTP I PTISGNALRD YAEARGIKIG TCVNYPFYNN SDPTYNSILQ REFSMVVCEN  
EMKFDALQPR QNVFDFSKGD QLLAFAERNQ MQMRGHTLIW HNQNPSWLTN GNWNRDSSLA VMKNHITVVM  
THYKGGKIVFW DVANECMDDS GNGLRSSIWR NVIGQDYLDY AFRYAREADP DALLFYNDYN IEDLGPKSNA  
VFNMKISMKE RGVPIDGVGF QCHFINGMSP EYLASIDQNI KRYAEIGVIV SFTEIDIRIP QSENATAFQ  
VQANNYKELM KICLANPNCN TFVMWGFDTK YTWIPGTFPG YGNPLIYDSN YNPKPAYNAI KEALMGY

### Xyn11B (Clo1313\_0522)

MKQKLLVTFL ILITFTVSLT LFPVNVADV VITSNQTGTH GGYNFEYWKD TGNGTMVLKD GGAFSCEWSN  
INNILFRKGF KYDETKTHDQ LGYITVTYSC NYQPNGNSYL GVGWTSNPL VEYIIIESWG TWRPPGATPK  
GTITVDGGTY EIYETTRVNQ PSIKGTATFQ QYWSVRTSKR TSGTISVTEH FKAWERLGMK MGKMYEVALV  
VEGYQSSGKA DVTSMTITVG NAPSTSSPPG PTPEPTPSA FSKIEAEEYN SLKSSTIQT I GTSDGGSGIG  
YIESGDYLVF NKINFGNGAN SFKARVASGA DTPTNIQLRL GSPTGTLIGHT LTVASTGGWN NYEEKSCSIT  
NTTGQHDLYL VFSGPVNIDY FIFDSKGVNP TPTPTSPQQ DQVLGDLNGD KQVNSTDYTA LKRHLLNITR  
LSGTALANAD VNRDGKVDST DLMMLHRYLL RIISKLG

**Fig. S9. Identification of the overexpressed Xyn10Z and Xyn11B in  $\Delta$ rsgI6.** The two additional bands in SDS-PAGE analysis (Fig. 4C) of the extracellular proteins of  $\Delta$ rsgI6 compared with wild-type strain were identified by LTQ-ESI-MS/MS mass spectrometry. The detected peptide segments are highlighted in green.

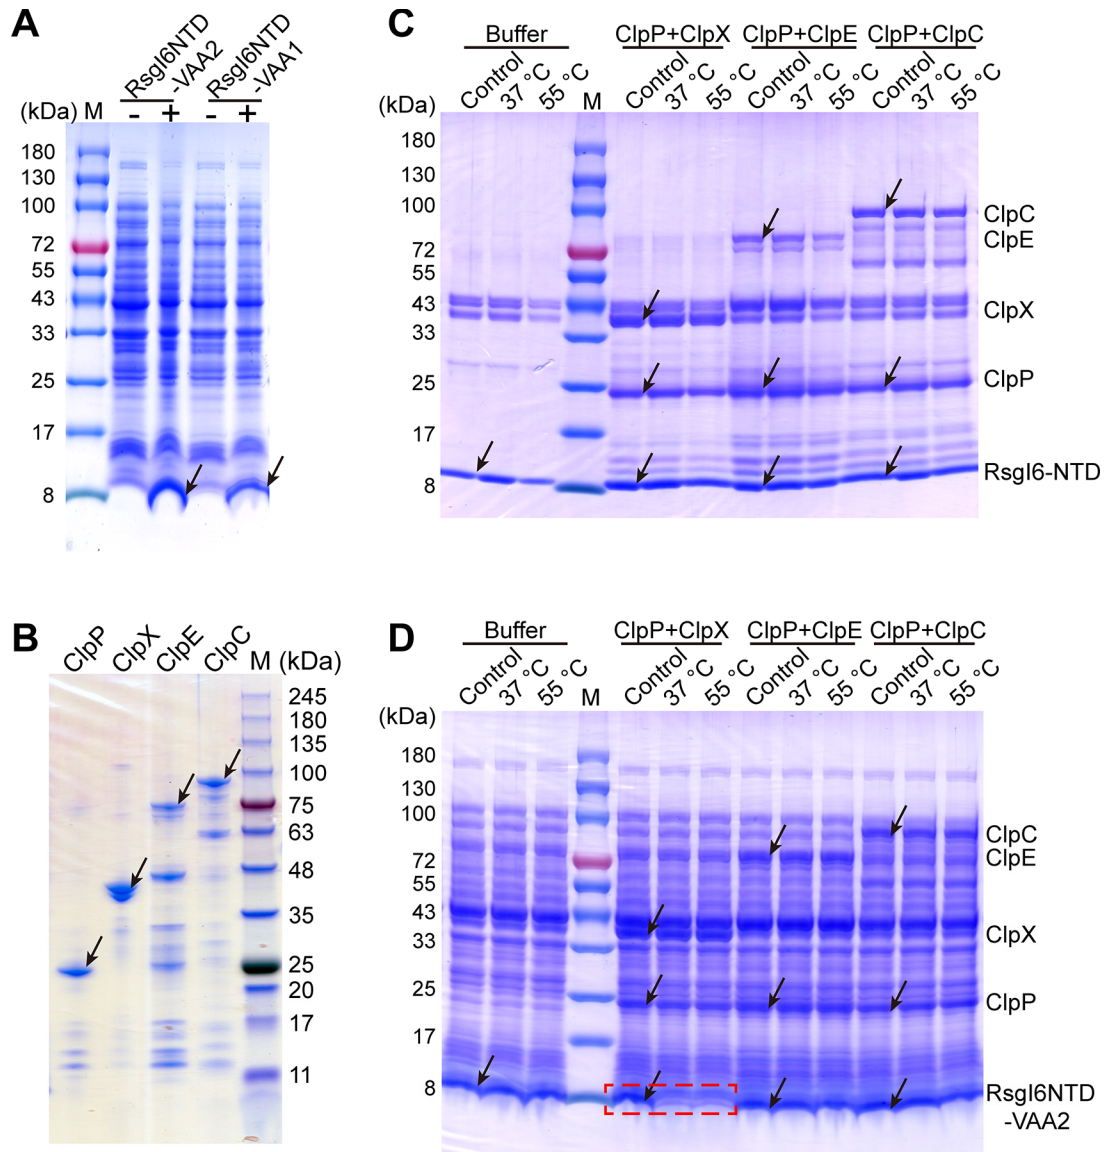

**Fig. S10. Identification of the ClpP protease complex in the degradation of the RsgI6-NTD.** (A) The cell lysate of overexpressed recombinant RsgI6NTD-VAA1 and RsgI6NTD-VAA2. (B) The purified recombinant ClpP, ClpX, ClpE, and ClpC. (C-D) The protease assays, using RsgI6NTD (C) and RsgI6NTD-VAA2 (D) as the substrate, respectively. The positions of the proteases and substrates in the control (the mixture before the reaction) are indicated by arrows. The degradation of substrate bands is indicated by a red-dashed rectangle.

**Table S1.****Bacterial strains used in this study.**

| <b>Strains</b>                                   | <b>Relevant characteristic</b>                                                                                                                                                                                                                                                                         | <b>Sources</b> |
|--------------------------------------------------|--------------------------------------------------------------------------------------------------------------------------------------------------------------------------------------------------------------------------------------------------------------------------------------------------------|----------------|
| <i>E. coli</i>                                   |                                                                                                                                                                                                                                                                                                        |                |
| DH5 $\alpha$                                     | <i>f80dlacZ</i> $\Delta$ M15, $\Delta$ ( <i>lacZYA-argF</i> )U169, <i>deoR</i> , <i>recA1</i> , <i>endA1</i> , <i>hsdR17</i> ( <i>r<sub>k</sub><sup>-</sup></i> , <i>m<sub>k</sub><sup>+</sup></i> ), <i>phoA</i> , <i>supE44</i> , <i>l<sup>-</sup></i> , <i>thi-1</i> , <i>gyrA96</i> , <i>relA1</i> | Transgen       |
| BL21(DE3)                                        | <i>ompT</i> , <i>gal</i> , <i>dcm</i> , <i>lon</i> , <i>hsdS<sub>B</sub></i> ( <i>r<sub>B</sub><sup>-</sup></i> , <i>m<sub>B</sub><sup>-</sup></i> ), <i>l</i> (DE3 [ <i>lacI lacUV5-T7 gene 1 ind1 sam7 nin5</i> ])                                                                                   | Transgen       |
| BL21(DE3):: <i>pET28a-SMT3-rsgI2-PD</i>          | BL21(DE3) strain containing a pET28a-SMT3 derivative for RsgI2-PD expression                                                                                                                                                                                                                           | This work      |
| BL21(DE3):: <i>pET28a-SMT3-rsgI2N97A-PD</i>      | BL21(DE3) strain containing a pET28a-SMT3 derivative for RsgI2N97A-PD expression                                                                                                                                                                                                                       | This work      |
| BL21(DE3):: <i>pET28a-SMT3-rsgI2P98A-PD</i>      | BL21(DE3) strain containing a pET28a-SMT3 derivative for RsgI2P98A-PD expression                                                                                                                                                                                                                       | This work      |
| BL21(DE3):: <i>pET28a-SMT3-rsgI2D95A-PD</i>      | BL21(DE3) strain containing a pET28a-SMT3 derivative for RsgI2D95A-PD expression                                                                                                                                                                                                                       | This work      |
| BL21(DE3):: <i>pET28a-SMT3-rsgI2S99A-PD</i>      | BL21(DE3) strain containing a pET28a-SMT3 derivative for RsgI2S99A-PD expression                                                                                                                                                                                                                       | This work      |
| BL21(DE3):: <i>pET28a-SMT3-rsgI2N117A-PD</i>     | BL21(DE3) strain containing a pET28a-SMT3 derivative for RsgI2N117A-PD expression                                                                                                                                                                                                                      | This work      |
| BL21(DE3):: <i>pET28a-SMT3-rsgI2D119A-PD</i>     | BL21(DE3) strain containing a pET28a-SMT3 derivative for RsgI2D119A-PD expression                                                                                                                                                                                                                      | This work      |
| BL21(DE3):: <i>pET28a-SMT3-rsgI2R218A-PD</i>     | BL21(DE3) strain containing a pET28a-SMT3 derivative for RsgI2R218A-PD expression                                                                                                                                                                                                                      | This work      |
| BL21(DE3):: <i>pET28a-SMT3-rsgI2D95AD119A-PD</i> | BL21(DE3) strain containing a pET28a-SMT3 derivative for RsgI2D95AD119A-PD expression                                                                                                                                                                                                                  | This work      |
| BL21(DE3):: <i>pET28a-SMT3-rsgI2D95AR218A-PD</i> | BL21(DE3) strain containing a pET28a-SMT3 derivative for RsgI2D95AR218A-PD expression                                                                                                                                                                                                                  | This work      |
| BL21(DE3):: <i>pET28a-SMT3-rsgI2S99AD119A-PD</i> | BL21(DE3) strain containing a pET28a-SMT3 derivative for RsgI2S99AD119A-PD expression                                                                                                                                                                                                                  | This work      |
| BL21(DE3):: <i>pET28a-SMT3-rsgI2S99AR218A-PD</i> | BL21(DE3) strain containing a pET28a-SMT3 derivative for RsgI2S99AR218A-PD expression                                                                                                                                                                                                                  | This work      |

|                                                                            |                                                                                                                    |           |
|----------------------------------------------------------------------------|--------------------------------------------------------------------------------------------------------------------|-----------|
| BL21(DE3)::pET28a-<br><i>SMT3-rsgI2D119AR218A-PD</i>                       | BL21(DE3) strain containing a pET28a-SMT3 derivative for RsgI2D119AR218A-PD expression                             | This work |
| BL21(DE3)::pET28a-<br><i>SMT3-rsgI6-PD</i>                                 | BL21(DE3) strain containing a pET28a-SMT3 derivative for RsgI6-PD expression                                       | This work |
| BL21(DE3)::pET28a-<br><i>SMT3-rsgI6P95A-PD</i>                             | BL21(DE3) strain containing a pET28a-SMT3 derivative for RsgI6P95A-PD expression                                   | This work |
| BL21(DE3)::pET28a-<br><i>rsgI6-NTD</i>                                     | BL21(DE3) strain containing a pET28a derivative for RsgI6-NTD expression                                           | This work |
| BL21(DE3)::pET28a-<br><i>clpX</i>                                          | BL21(DE3) strain containing a pET28a derivative for ClpX expression                                                | This work |
| BL21(DE3)::pET28a-<br><i>clpE</i>                                          | BL21(DE3) strain containing a pET28a derivative for ClpE expression                                                | This work |
| BL21(DE3)::pET28a-<br><i>clpC</i>                                          | BL21(DE3) strain containing a pET28a derivative for ClpC expression                                                | This work |
| BL21(DE3)::pET30a-<br><i>rsgI1-PD</i>                                      | BL21(DE3) strain containing a pET30a derivative for RsgI1-PD expression                                            | This work |
| BL21(DE3)::pET30a-<br><i>rsgI2-PD</i>                                      | BL21(DE3) strain containing a pET30a derivative for RsgI2-PD expression                                            | This work |
| BL21(DE3)::pET30a-<br><i>rsgI6-PD</i>                                      | BL21(DE3) strain containing a pET30a derivative for RsgI6-PD expression                                            | This work |
| BL21(DE3)::pET30a-<br><i>rsgI6NTD-VAA1</i>                                 | BL21(DE3) strain containing a pET30a derivative for RsgI6-NTD-VAA1 expression                                      | This work |
| BL21(DE3)::pET30a-<br><i>rsgI6NTD-VAA2</i>                                 | BL21(DE3) strain containing a pET30a derivative for RsgI6-NTD-VAA2 expression                                      | This work |
| BL21(DE3)::pET30a-<br><i>clpP</i>                                          | BL21(DE3) strain containing a pET30a derivative for ClpP expression                                                | This work |
| <i>C. thermocellum</i>                                                     |                                                                                                                    |           |
| DSM1313                                                                    | Wild type strain                                                                                                   | DSMZ      |
| $\Delta$ <i>rsgI2</i>                                                      | Derived from DSM1313, with deleted <i>rsgI2</i> gene <i>clo1313_1962</i>                                           | This work |
| $\Delta$ <i>rsgI2</i> :: <i>rsgI2-NHA</i>                                  | Derived from $\Delta$ <i>rsgI2</i> , with the plasmid pHK- <i>P2638-RsgI2-NHA</i>                                  | This work |
| $\Delta$ <i>rsgI2</i> :: <i>rsgI2P98A-NHA</i>                              | Derived from $\Delta$ <i>rsgI2</i> , with the plasmid pHK- <i>P2638-RsgI2P98A-NHA</i>                              | This work |
| $\Delta$ <i>rsgI2</i> :: <i>rsgI2-CHA</i>                                  | Derived from $\Delta$ <i>rsgI2</i> , with the plasmid pHK- <i>P2638-RsgI2-CHA</i>                                  | This work |
| $\Delta$ <i>rsgI2</i> :: <i>rsgI2-CHis</i>                                 | Derived from $\Delta$ <i>rsgI2</i> , with the plasmid pHK- <i>P2638-RsgI2-CHis</i>                                 | This work |
| $\Delta$ <i>rsgI2</i> :: <i>rsgI2</i> $\Delta$ <i>CBM-CHA</i>              | Derived from $\Delta$ <i>rsgI2</i> , with the plasmid pHK- <i>P2638-RsgI2</i> $\Delta$ <i>CBM-CHA</i>              | This work |
| $\Delta$ <i>rsgI2</i> :: <i>rsgI2</i> $\Delta$ <i>CWCRA</i> <i>CBM-CHA</i> | Derived from $\Delta$ <i>rsgI2</i> , with the plasmid pHK- <i>P2638-RsgI2</i> $\Delta$ <i>CWCRA</i> <i>CBM-CHA</i> | This work |
| $\Delta$ <i>rsgI2</i> :: <i>rsgI2</i> $\Delta$ <i>CWCRA</i> <i>CBM-NHA</i> | Derived from $\Delta$ <i>rsgI2</i> , with the plasmid pHK- <i>P2638-RsgI2</i> $\Delta$ <i>CWCRA</i> <i>CBM-NHA</i> | This work |

|                                                               |                                                                                                                                 |           |
|---------------------------------------------------------------|---------------------------------------------------------------------------------------------------------------------------------|-----------|
| DSM1313:: <i>rsgI1-NHA</i>                                    | Derived from DSM1313, with the plasmid pHK- <i>P<sub>2638</sub></i> -RsgI1NHA                                                   | This work |
| DSM1313:: <i>rsgI3-NHA</i>                                    | Derived from DSM1313, with the plasmid pHK- <i>P<sub>2638</sub></i> -RsgI3NHA                                                   | This work |
| DSM1313:: <i>rsgI4-NHA</i>                                    | Derived from DSM1313, with the plasmid pHK- <i>P<sub>2638</sub></i> -RsgI4NHA                                                   | This work |
| DSM1313:: <i>rsgI6-NHA</i>                                    | Derived from DSM1313, with the plasmid pHK- <i>P<sub>2638</sub></i> -RsgI6NHA                                                   | This work |
| DSM1313:: <i>rsgI6P95A-NHA</i>                                | Derived from DSM1313, with the plasmid pHK- <i>P<sub>2638</sub></i> -RsgI6P95A-NHA                                              | This work |
| DSM1313:: <i>rsgI8-NHA</i>                                    | Derived from DSM1313, with the plasmid pHK- <i>P<sub>2638</sub></i> -RsgI8NHA                                                   | This work |
| $\Delta$ <i>pyrF</i>                                          | Derived from DSM1313, with deleted <i>pyrF</i> gene <i>clo1313_1266</i>                                                         | (48)      |
| $\Delta$ <i>rsgI6</i>                                         | Derived from $\Delta$ <i>pyrF</i> , with deleted <i>rsgI6</i> gene <i>clo1313_2777</i>                                          | This work |
| $\Delta$ <i>rsgI6</i> :: <i>rsgI6</i>                         | Derived from $\Delta$ <i>rsgI6</i> , with the plasmid pHK- <i>P<sub>sigI6</sub></i> -RsgI6                                      | This work |
| $\Delta$ <i>rsgI6</i> :: <i>rsgI6-T1</i>                      | Derived from $\Delta$ <i>rsgI6</i> , with the plasmid pHK- <i>P<sub>sigI6</sub></i> -RsgI6-T1                                   | This work |
| $\Delta$ <i>rsgI6</i> :: <i>rsgI6-T2</i>                      | Derived from $\Delta$ <i>rsgI6</i> , with the plasmid pHK- <i>P<sub>sigI6</sub></i> -RsgI6-T2                                   | This work |
| $\Delta$ <i>rsgI6</i> :: <i>rsgI6-T3</i>                      | Derived from $\Delta$ <i>rsgI6</i> , with the plasmid pHK- <i>P<sub>sigI6</sub></i> -RsgI6-T3                                   | This work |
| $\Delta$ <i>rsgI6</i> :: <i>rsgI6-T4</i>                      | Derived from $\Delta$ <i>rsgI6</i> , with the plasmid pHK- <i>P<sub>sigI6</sub></i> -RsgI6-T4                                   | This work |
| $\Delta$ <i>rsgI6</i> :: <i>rsgI6-T5</i>                      | Derived from $\Delta$ <i>rsgI6</i> , with the plasmid pHK- <i>P<sub>sigI6</sub></i> -RsgI6-T5                                   | This work |
| $\Delta$ <i>rsgI6</i> $\Delta$ <i>rseP</i>                    | Derived from $\Delta$ <i>pyrF</i> , with deleted <i>rsgI6</i> gene <i>clo1313_2777</i> and <i>rsep</i> gene <i>clo1313_1217</i> | This work |
| $\Delta$ <i>rsgI6</i> $\Delta$ <i>rseP</i> :: <i>rsgI6-T3</i> | Derived from $\Delta$ <i>rsgI6</i> $\Delta$ <i>rseP</i> , with the plasmid pHK- <i>P<sub>sigI6</sub></i> -RsgI6-T3              | This work |
| $\Delta$ <i>sigI6-rsgI6</i>                                   | Derived from $\Delta$ <i>pyrF</i> , with deleted <i>sigI6</i> and <i>rsgI6</i> gene <i>clo1313_2778</i> and <i>clo1313_2777</i> | This work |
| $\Delta$ <i>sigI6-rsgI6</i> :: <i>sigI6-rsgI6</i>             | Derived from $\Delta$ <i>sigI6-rsgI6</i> , with the plasmid pHK- <i>P<sub>sigI6</sub></i> -SigI6-RsgI6                          | This work |
| $\Delta$ <i>sigI6-rsgI6</i> :: <i>sigI6-rsgI6P95A</i>         | Derived from $\Delta$ <i>sigI6-rsgI6</i> , with the plasmid pHK- <i>P<sub>sigI6</sub></i> -SigI6-RsgI6-P95A                     | This work |
| $\Delta$ <i>sigI6-rsgI6</i> :: <i>sigI6-rsgI6N94AP95A</i>     | Derived from $\Delta$ <i>sigI6-rsgI6</i> , with the plasmid pHK- <i>P<sub>sigI6</sub></i> -SigI6-RsgI6-N94AP95A                 | This work |

**Table S2.****Plasmids used in this study.**

| <b>Plasmids</b>                | <b>Relevant characteristic</b>                                                                                          |
|--------------------------------|-------------------------------------------------------------------------------------------------------------------------|
| pET28a-SMT3-RsgI2-PD           | pET28a derivative for RsgI2-PD (residues 86-259) expression in BL21(DE3) with N-terminal His tag and SMT3 tag           |
| pET28a-SMT3-RsgI2N97A-PD       | pET28a derivative for RsgI2N97A-PD (residues 86-259) expression in BL21(DE3) with N-terminal His tag and SMT3 tag       |
| pET28a-SMT3-RsgI2P98A-PD       | pET28a derivative for RsgI2P98A-PD (residues 86-259) expression in BL21(DE3) with N-terminal His tag and SMT3 tag       |
| pET28a-SMT3-RsgI2D95A-PD       | pET28a derivative for RsgI2D95A-PD (residues 86-259) expression in BL21(DE3) with N-terminal His tag and SMT3 tag       |
| pET28a-SMT3-RsgI2S99A-PD       | pET28a derivative for RsgI2S99A-PD (residues 86-259) expression in BL21(DE3) with N-terminal His tag and SMT3 tag       |
| pET28a-SMT3-RsgI2N117A-PD      | pET28a derivative for RsgI2N117A-PD (residues 86-259) expression in BL21(DE3) with N-terminal His tag and SMT3 tag      |
| pET28a-SMT3-RsgI2D119A-PD      | pET28a derivative for RsgI2D119A-PD (residues 86-259) expression in BL21(DE3) with N-terminal His tag and SMT3 tag      |
| pET28a-SMT3-RsgI2R218A-PD      | pET28a derivative for RsgI2R218A-PD (residues 86-259) expression in BL21(DE3) with N-terminal His tag and SMT3 tag      |
| pET28a-SMT3-RsgI2D95AD119A-PD  | pET28a derivative for RsgI2D95AD119A-PD (residues 86-259) expression in BL21(DE3) with N-terminal His tag and SMT3 tag  |
| pET28a-SMT3-RsgI2D95AR218A-PD  | pET28a derivative for RsgI2D95AR218A-PD (residues 86-259) expression in BL21(DE3) with N-terminal His tag and SMT3 tag  |
| pET28a-SMT3-RsgI2S99AD119A-PD  | pET28a derivative for RsgI2S99AD119A-PD (residues 86-259) expression in BL21(DE3) with N-terminal His tag and SMT3 tag  |
| pET28a-SMT3-RsgI2S99AR218A-PD  | pET28a derivative for RsgI2S99AR218A-PD (residues 86-259) expression in BL21(DE3) with N-terminal His tag and SMT3 tag  |
| pET28a-SMT3-RsgI2D119AR218A-PD | pET28a derivative for RsgI2D119AR218A-PD (residues 86-259) expression in BL21(DE3) with N-terminal His tag and SMT3 tag |
| pET28a-SMT3-RsgI6-PD           | pET28a derivative for RsgI6-PD (residues 84-258) expression in BL21(DE3) with N-terminal His tag and SMT3 tag           |



|                                              |                                                                                                                                          |
|----------------------------------------------|------------------------------------------------------------------------------------------------------------------------------------------|
| pET28a-SMT3-RsgI6P95A-PD                     | pET28a derivative for RsgI6P95A-PD (residues 84-258) expression in BL21(DE3) with N-terminal His tag and SMT3 tag                        |
| pET28a-RsgI6-NTD                             | pET28a derivative for RsgI6-NTD (residues 1-50) expression in BL21(DE3) with N-terminal His tag                                          |
| pET28a-ClpX                                  | pET28a derivative for ClpX (residues 61-409) expression in BL21(DE3) with N-terminal His tag                                             |
| pET28a-ClpE                                  | pET28a derivative for ClpE (residues 138-779) expression in BL21(DE3) with N-terminal His tag                                            |
| pET28a-ClpC                                  | pET28a derivative for ClpC expression in BL21(DE3) with N-terminal His tag                                                               |
| pET30a-RsgI2-PD                              | pET30a derivative for RsgI2PD (residues 89-248) expression in BL21(DE3) with C-terminal His tag                                          |
| pET30a-RsgI1-PD                              | pET30a derivative for RsgI1PD (residues 87-253) expression in BL21(DE3) with C-terminal His tag                                          |
| pET30a-RsgI6-PD                              | pET30a derivative for RsgI6PD (residues 86-252) expression in BL21(DE3) with C-terminal His tag                                          |
| pET30a-RsgI6-NTD-VAA1                        | pET30a derivative for RsgI6-NTD-VAA1 (residues 1-60) expression in BL21(DE3) without His tag                                             |
| pET30a-RsgI6-NTD-VAA2                        | pET30a derivative for RsgI6-NTD-VAA2 (residues 1-63) expression in BL21(DE3) without His tag                                             |
| pET30a-ClpP                                  | pET30a derivative for full-length ClpP expression in BL21(DE3) with C-terminal His tag                                                   |
| pLin-1d-GST-RsgI2-PD-Flag                    | pLin-1d derivative for RsgI2PD (residues 89-248) expression in the cell-free PURE system with N-terminal GST tag and C-terminal Flag tag |
| pHK-TT1A-RsgI2 9a                            | pHK-TT1A derivative, RsgI2 9a intron                                                                                                     |
| pHK-TT1A-RseP 13a                            | pHK-TT1A derivative, RseP 13a intron                                                                                                     |
| pHK-HR-RsgI6                                 | pHK-HR derivative, containing <i>rsgI6</i> gene upstream and downstream sequence                                                         |
| pHK-HR-SigI-RsgI6                            | pHK-HR derivative, containing <i>sigI6-rsgI6</i> gene upstream and downstream sequence                                                   |
| pHK- <i>P</i> <sub>2638</sub> -RsgI2-CHA     | pHK derivative for RsgI2 expression in <i>C. thermocellum</i> driven by the <i>clo1313_2638</i> promoter with C-terminal HA tag          |
| pHK- <i>P</i> <sub>2638</sub> -RsgI2-NHA     | pHK derivative for RsgI2 expression in <i>C. thermocellum</i> driven by the <i>clo1313_2638</i> promoter with N-terminal HA tag          |
| pHK- <i>P</i> <sub>2638</sub> -RsgI2P98A-NHA | pHK derivative for RsgI2P98A expression in <i>C. thermocellum</i> driven by the <i>clo1313_2638</i> promoter with N-terminal HA tag      |
| pHK- <i>P</i> <sub>2638</sub> -RsgI2-CHis    | pHK derivative for RsgI2 expression in <i>C. thermocellum</i> driven by the <i>clo1313_2638</i> promoter with C-terminal His tag         |
| pHK- <i>P</i> <sub>2638</sub> -RsgI2ΔCBM-CHA | pHK derivative for RsgI2ΔCBM (deletes the C-terminal CBM3b domain, residues 1-504) expression in <i>C.</i>                               |

|                                                  |                                                                                                                                                                                                                                 |
|--------------------------------------------------|---------------------------------------------------------------------------------------------------------------------------------------------------------------------------------------------------------------------------------|
|                                                  | <i>thermocellum</i> driven by the <i>clo1313_2638</i> promoter with C-terminal HA tag                                                                                                                                           |
| pHK- <i>P</i> <sub>2638</sub> -RsgI2ΔCWCRCBM-CHA | pHK derivative for RsgI2ΔCWCRCBM (deletes the cell wall-crossing region and the C-terminal CBM3b domain, residues 1-248) expression in <i>C. thermocellum</i> driven by the <i>clo1313_2638</i> promoter with C-terminal HA tag |
| pHK- <i>P</i> <sub>2638</sub> -RsgI2ΔCWCRCBM-NHA | pHK derivative for RsgI2ΔCWCRCBM (deletes the cell wall-crossing region and the C-terminal CBM3b domain, residues 1-248) expression in <i>C. thermocellum</i> driven by the <i>clo1313_2638</i> promoter with N-terminal HA tag |
| pHK- <i>P</i> <sub>2638</sub> -RsgI1-NHA         | pHK derivative for RsgI1 expression in <i>C. thermocellum</i> driven by the <i>clo1313_2638</i> promoter with N-terminal HA tag                                                                                                 |
| pHK- <i>P</i> <sub>2638</sub> -RsgI3-NHA         | pHK derivative for RsgI3 expression in <i>C. thermocellum</i> driven by the <i>clo1313_2638</i> promoter with N-terminal HA tag                                                                                                 |
| pHK- <i>P</i> <sub>2638</sub> -RsgI4-NHA         | pHK derivative for RsgI4 expression in <i>C. thermocellum</i> driven by the <i>clo1313_2638</i> promoter with N-terminal HA tag                                                                                                 |
| pHK- <i>P</i> <sub>2638</sub> -RsgI6-NHA         | pHK derivative for RsgI6 expression in <i>C. thermocellum</i> driven by the <i>clo1313_2638</i> promoter with N-terminal HA tag                                                                                                 |
| pHK- <i>P</i> <sub>2638</sub> -RsgI6P95A-NHA     | pHK derivative for RsgI6P95A expression in <i>C. thermocellum</i> driven by the <i>clo1313_2638</i> promoter with N-terminal HA tag                                                                                             |
| pHK- <i>P</i> <sub>2638</sub> -RsgI8-NHA         | pHK derivative for RsgI8 expression in <i>C. thermocellum</i> driven by the <i>clo1313_2638</i> promoter with N-terminal HA tag                                                                                                 |
| pHK- <i>P</i> <sub>sigI6</sub> -RsgI6            | pHK derivative for RsgI6 expression in <i>C. thermocellum</i> driven by <i>sigI6</i> ( <i>clo1313_2778</i> ) promoter                                                                                                           |
| pHK- <i>P</i> <sub>sigI6</sub> -RsgI6-T1         | pHK derivative for RsgI6-T1 (contains the N-terminal cytoplasmic domain, residues 1-50) expression in <i>C. thermocellum</i> driven by <i>sigI6</i> promoter                                                                    |
| pHK- <i>P</i> <sub>sigI6</sub> -RsgI6-T2         | pHK derivative for RsgI6-T2 (contains the N-terminal domain and the transmembrane helix, residues 1-83) expression in <i>C. thermocellum</i> driven by <i>sigI6</i> promoter                                                    |
| pHK- <i>P</i> <sub>sigI6</sub> -RsgI6-T3         | pHK derivative for RsgI6-T3 (contains the N-terminal domain, the transmembrane helix, and β1 of the periplasmic domain, residues 1-94) expression in <i>C. thermocellum</i> driven by <i>sigI6</i> promoter                     |
| pHK- <i>P</i> <sub>sigI6</sub> -RsgI6-T4         | pHK derivative for RsgI6-T4 (deletion of the cell wall-crossing region and the C-terminal GH5 domain, residues 1-252) expression in <i>C. thermocellum</i> driven by <i>sigI6</i> promoter                                      |

|                                                    |                                                                                                                                                          |
|----------------------------------------------------|----------------------------------------------------------------------------------------------------------------------------------------------------------|
| pHK- <i>P<sub>sigI6</sub></i> -RsgI6-T5            | pHK derivative for RsgI6-T5 (deletion of the C-terminal GH5 domain, residues 1-455) expression in <i>C. thermocellum</i> driven by <i>sigI6</i> promoter |
| pHK- <i>P<sub>sigI6</sub></i> -SigI6-RsgI6         | pHK derivative for SigI6-RsgI6 expression in <i>C. thermocellum</i> driven by <i>sigI6</i> promoter                                                      |
| pHK- <i>P<sub>sigI6</sub></i> -SigI6-RsgI6P95A     | pHK derivative for SigI6-RsgI6P95A expression in <i>C. thermocellum</i> driven by <i>sigI6</i> promoter                                                  |
| pHK- <i>P<sub>sigI6</sub></i> -SigI6-RsgI6N94AP95A | pHK derivative for SigI6-RsgI6N94AP95A expression in <i>C. thermocellum</i> driven by the <i>sigI6</i> promoter                                          |

---

**Table S3.****Primers used in this study.**

| Primers                       | Sequences (5'-3') <sup>a</sup>                  | Notes                                                                    |
|-------------------------------|-------------------------------------------------|--------------------------------------------------------------------------|
| RsgI2-PD <sup>86-259</sup> -F | TTAGGATCCTCCCAGGAATATGCTT<br>ATATAGATG          | To construct the<br>RsgI-PDs<br>expression<br>plasmids in <i>E. coli</i> |
| RsgI2-PD <sup>86-259</sup> -R | ATTACTCGAGTCAAGTATCGGAGAT<br>GGCG               |                                                                          |
| RsgI1-PD <sup>87-253</sup> -F | CGCCATATGTACGGATATATATGCGT<br>TG                |                                                                          |
| RsgI1-PD <sup>87-253</sup> -R | CCGCTCGAGTTTCTCTATCATATCTG<br>AAATAC            |                                                                          |
| RsgI6-PD <sup>86-252</sup> -F | CGCCATATGTATGCTTATGTTGGCAT<br>TG                |                                                                          |
| RsgI6-PD <sup>86-252</sup> -R | CCGCTCGAGCTTGGCAATGAGCTC<br>CAG                 |                                                                          |
| RsgI2-PD <sup>89-248</sup> -F | TAACATATGTATGCTTATATAGATGT<br>TGATATAAAT        |                                                                          |
| RsgI2-PD <sup>89-248</sup> -R | TTTACTCGAGTTTGCCAAGAATCTC<br>GG                 |                                                                          |
| N97A-F                        | CTTATATAGATGTTGATATAGCTCCA<br>AGCATTGGGCTTGTAAT | For the mutation<br>of RsgI2                                             |
| N97A-R                        | ATTACAAGCCCAATGCTTGGAGCTA<br>TATCAACATCTATATAAG |                                                                          |
| P98A-F                        | ATATAGATGTTGATATAAATGCTAGC<br>ATTGGGCTTGTAATTGA |                                                                          |
| P98A-R                        | TCAATTACAAGCCCAATGCTAGCAT<br>TTATATCAACATCTATAT |                                                                          |
| D95A-F                        | AATATGCTTATATAGATGTTGCTATA<br>AATCCAAGCATTGGGCT |                                                                          |
| D95A-R                        | AGCCCAATGCTTGGATTTATAGCAA<br>CATCTATATAAGCATATT |                                                                          |
| S99A-F                        | TAGATGTTGATATAAATCCAGCTATT<br>GGGCTTGTAATTGATAA |                                                                          |
| S99A-R                        | TTATCAATTACAAGCCCAATAGCTG<br>GATTTATATCAACATCTA |                                                                          |
| N117A-F                       | TTATAGACGCAAAACCTTTAGCTAA<br>TGACGCAAAACCGATTCT |                                                                          |
| N117A-R                       | AGAATCGGTTTTGCGTCATTAGCTA<br>AAGGTTTTGCGTCTATAA |                                                                          |
| D119A-F                       | ACGCAAAACCTTTAAATAATGCTGC<br>AAAACCGATTCTCGATGA |                                                                          |
| D119A-R                       | TCATCGAGAATCGGTTTTGCAGCAT<br>TATTTAAAGGTTTTGCGT |                                                                          |
| R218A-F                       | ACCAAAATCTTTCCATGGGAGCTTA<br>TGCTATATATGTAAAAGC |                                                                          |

|                    |                                                    |                                                                                      |
|--------------------|----------------------------------------------------|--------------------------------------------------------------------------------------|
| R218A-R            | GCTTTTACATATATAGCATAAGCTCC<br>CATGGAAAGATTTTGGT    |                                                                                      |
| P95A-F             | TATGTTGGCATTGATATAAATGCTAG<br>TATTGAGCTTTGGATAAAT  | For the mutation<br>of RsgI6                                                         |
| P95A-R             | ATTTATCCAAAGCTCAATACTAGCA<br>TTTATATCAATGCCAACATA  |                                                                                      |
| N94AP95A-F         | TATGTTGGCATTGATATAAGCTGCTAG<br>TATTGAGCTTTGGATAAAT |                                                                                      |
| N94AP95A-R         | ATTTATCCAAAGCTCAATACTAGCA<br>GCTATATCAATGCCAACATA  |                                                                                      |
| RsgI2 9a IBS12     | AAAAGTAGTAAgattcccgtgaGTGCG<br>ACGCGAAAGCTAG       | To construct the<br>corresponding<br>targetrons                                      |
| RsgI2 9a EBS2      | CGCTAGAAGCCTCGTTAaatcaAGCA<br>GGCCAAAGATGCTG       |                                                                                      |
| RsgI2 9a EBS1a     | CCCCGTACGCTGAcgtgaAGCAGCGt<br>ATCCAATCC            |                                                                                      |
| RseP 13a IBS12     | AAAAGTAGTAAgccagaataaccaGTGCG<br>ACGCGAAAGCTAG     |                                                                                      |
| RseP 13a EBS2      | CGCTAGAAGCCTCGTTActggcAGCA<br>GGCCAAAGATGCTG       |                                                                                      |
| RseP 13a EBS1a     | CCCCGTACGCTGAtaaccaAGCAGCGt<br>ATCCAATCC           |                                                                                      |
| RsgI6_up-F         | CCGGAATTCGCCATGGAAAATCCC<br>GATG                   | For the<br>construction of<br>$\Delta$ rsgI6 by<br>homologous<br>recombination       |
| RsgI6_up-R         | ACGCGTCGACCGGTATTTTGAATGC<br>GGGAA                 |                                                                                      |
| RsgI6_m-F          | CCGCTCGAGAAGTCCTGGTTGAGC<br>ACAAA                  |                                                                                      |
| RsgI6_m-R          | GAAAAGGAGGTGGATTTGCGCGGT<br>ATTTTGAATGCGGGAA       |                                                                                      |
| RsgI6_down-F       | TTCCCGCATTCAAATACCGCGCAA<br>ATCCACCTCCTTTTC        |                                                                                      |
| RsgI6_down-R       | CCGAGATCTATTTGTTTGCACCTGT<br>TTGA                  |                                                                                      |
| SigI6-RsgI6_up-F   | CCGGAATTCGCCATGGAAAATCCC<br>GATG                   | For the<br>construction of<br>$\Delta$ sigI6-rsgI6 by<br>homologous<br>recombination |
| SigI6-RsgI6_up-R   | ACGCGTCGACCGGTATTTTGAATGC<br>GGGAA                 |                                                                                      |
| SigI6-RsgI6_m-F    | CCGCTCGAGAAGTCCTGGTTGAGC<br>ACAAA                  |                                                                                      |
| SigI6-RsgI6_m-R    | GAATAAGGGGTGAAATTAACCGCC<br>GGTATTTTGAATGCGGGAA    |                                                                                      |
| SigI6-RsgI6_down-F | TTCCCGCATTCAAATACCGGCGGT<br>TAATTTCAACCCTTATTC     |                                                                                      |
| SigI6-RsgI6_down-R | CCGAGATCTTCCATAATTTTATTAC<br>CAAT                  |                                                                                      |

---

|                         |                                                                            |                                                                                                                       |
|-------------------------|----------------------------------------------------------------------------|-----------------------------------------------------------------------------------------------------------------------|
| RsgI2-CHA-F             | CCGGAATTCTCACATTACACGGGA<br>ATCAT                                          | To construct the<br>overexpression<br>plasmids of RsgIs<br>with an HA tag or<br>His tag in <i>C.<br/>thermocellum</i> |
| RsgI2-CHA-R             | CCGCTCGAGTTAAGCGTAATCCGGT<br>ACATCGTACGGGTAATTATTAGGTTC<br>AATCCCCAATATAG  |                                                                                                                       |
| RsgI2-NHA-F             | CCGGAATTCTACCCGTACGATGTACC<br>GGATTACGCTAATAATTCACATTACA<br>CGGGAATCAT     |                                                                                                                       |
| RsgI2-NHA-R             | CCGCTCGAGTTAAGGTTCAATTCCC<br>CAAT                                          |                                                                                                                       |
| RsgI2-CHis-F            | CCGGAATTCTCACATTACACGGGA<br>ATCAT                                          |                                                                                                                       |
| RsgI2-CHis-R            | CCGCTCGAGTTAATGGTGATGGTGA<br>TGATGTGATCCAGGTTCAATTCCCC<br>AAT              |                                                                                                                       |
| RsgI2ΔCBM-<br>CHA-F     | CCGGAATTCTCACATTACACGGGA<br>ATCAT                                          |                                                                                                                       |
| RsgI2ΔCBM-<br>CHA-R     | CCGCTCGAGTTAAGCGTAATCCGGT<br>ACATCGTACGGGTAATTATTCGTAGG<br>CGCTGGCGATGGA   |                                                                                                                       |
| RsgI2ΔCWCRC<br>BM-CHA-F | CCGGAATTCTCACATTACACGGGA<br>ATCAT                                          |                                                                                                                       |
| RsgI2ΔCWCRC<br>BM-CHA-R | CCGCTCGAGTTAAGCGTAATCCGGT<br>ACATCGTACGGGTAATTATTTACTTT<br>GCCAAGAATCTCGG  |                                                                                                                       |
| RsgI2ΔCWCRC<br>BM-NHA-F | CCGGAATTCTACCCGTACGATGTACC<br>GGATTACGCTAATAATTCACATTACA<br>CGGGAATCAT     |                                                                                                                       |
| RsgI2ΔCWCRC<br>BM-NHA-R | CCGCTCGAGTTATACTTTGCCAAGA<br>ATCTCGG                                       |                                                                                                                       |
| RsgI1-NHA-F             | CCGGAATTCTACCCGTACGATGTACC<br>GGATTACGCTAATAATAACAGATTG<br>GGAATAATATATG   |                                                                                                                       |
| RsgI1-NHA-R             | CCGCTCGAGTTATCAATTGGGCTCA<br>ATTCC                                         |                                                                                                                       |
| RsgI3-NHA-F             | CCGGAATTCTACCCGTACGATGTACC<br>GGATTACGCTAATAATGATAACATAG<br>GAGTAATCATTAAG |                                                                                                                       |
| RsgI3-NHA-R             | CCGCTCGAGTTAATCTGCAAACAA<br>ATTTTTTG                                       |                                                                                                                       |
| RsgI4-NHA-F             | CCGGAATTCTACCCGTACGATGTACC<br>GGATTACGCTAATAATAATCTTGGAG<br>TGGTAATAAAAA   |                                                                                                                       |
| RsgI4-NHA-R             | CCGCTCGAGTCATGGTTCTCTTCCC<br>CAT                                           |                                                                                                                       |

---

|                             |                                                                           |                                                                                                                                |             |
|-----------------------------|---------------------------------------------------------------------------|--------------------------------------------------------------------------------------------------------------------------------|-------------|
| RsgI6-NHA-F                 | CCGGAATTCTACCCGTACGATGTACC<br>GGATTACGCTAATAATATTGTAGGAA<br>AAGTTCTTGATAT |                                                                                                                                |             |
| RsgI6-NHA-R                 | CCGCTCGAGTCAGGGAATTCTGTA<br>AGTAGTC                                       |                                                                                                                                |             |
| RsgI8-NHA-F                 | CCGGAATTCTACCCGTACGATGTACC<br>GGATTACGCTAATAATACAAAACAA<br>AAAGGTACTA     |                                                                                                                                |             |
| RsgI8-NHA-R                 | CCGCTCGAGCTATGGCATT TTTTCA<br>ATG                                         |                                                                                                                                |             |
| <i>P<sub>sigI6</sub></i> -F | TATGCTTCCGGCTCGTATGTAAG<br>ATATTTGGGTCATAC                                | To construct the plasmids for expression of the truncations of RsgI6 in $\Delta$ rsgI6 and SigI6-RsgI6 in $\Delta$ sigI6-rsgI6 |             |
| <i>P<sub>sigI6</sub></i> -R | CCGGTACATCGTACGGGTACATC<br>GGTTAATTTACACCC                                |                                                                                                                                |             |
| RsgI6-F                     | ATAAGGGGTGAAATTAACCGGTG<br>ATTGTAGGAAAAGTTCT                              |                                                                                                                                |             |
| RsgI6-R                     | TATTTTTATTTCTAGACTCGAGTC<br>AGGGAATTCTGTAAGTAG                            |                                                                                                                                |             |
| RsgI6-T5-R                  | TATTTTTATTTCTAGACTCGAGTC<br>AGGATTCATTTTCAAACACAG                         |                                                                                                                                |             |
| RsgI6-T4-R                  | TATTTTTATTTCTAGACTCGAGTC<br>ACTTGGCAATGAGCTCCAG                           |                                                                                                                                |             |
| RsgI6-T3-R                  | TATTTTTATTTCTAGACTCGAGTC<br>AATTTATATCAATGCCAACATAAGC                     |                                                                                                                                |             |
| RsgI6-T2-R                  | TATTTTTATTTCTAGACTCGAGTC<br>ATTTTCTTGCCGTATTTCC                           |                                                                                                                                |             |
| RsgI6-T1-R                  | TATTTTTATTTCTAGACTCGAGTC<br>AATTTTTAGGCTTGATTA                            |                                                                                                                                |             |
| SigI6-RsgI6-F               | ATAAGGGGTGAAATTAACCGGTG<br>GATTGGCATT TTTCAAGG                            |                                                                                                                                |             |
| SigI6-RsgI6-R               | TATTTTTATTTCTAGACTCGAGTC<br>AGGGAATTCTGTAAGTAG                            |                                                                                                                                |             |
| SigI6-F                     | GGGATGATTCTGCAAGGGAAGA                                                    |                                                                                                                                | For qRT-PCR |
| SigI6-R                     | TGCCTGTCAGTCGCCTTATACA                                                    |                                                                                                                                |             |
| Xyn10Z-F                    | TCTTACACGGCATAGGCGGTAG                                                    |                                                                                                                                |             |
| Xyn10Z-R                    | CGGCAATCAGATTGTCGGCAAT                                                    |                                                                                                                                |             |
| Xyn11B-F                    | ACCAGCAATCCGCTTGTAGAGT                                                    |                                                                                                                                |             |
| Xyn11B-R                    | CTCGTATGTACCACCGTCAACG                                                    |                                                                                                                                |             |
| Xyn10D-F                    | CGGACAGGACTCAGGATTGGAA                                                    |                                                                                                                                |             |
| Xyn10D-R                    | AACTTTGACCCATGCCGAAACC                                                    |                                                                                                                                |             |
| Cel9K-F                     | CCGTGGCATACTTGCGAAGACA                                                    |                                                                                                                                |             |
| Cel9K-R                     | AGCTTTGTTCCAGGCTCTCCT                                                     |                                                                                                                                |             |
| RPS-F                       | TGCCGTTGCCTACAGAAAGA                                                      |                                                                                                                                |             |
| RPS-R                       | GCGTCTACCGTCTTTGGTGTAG                                                    |                                                                                                                                |             |
| RsgI6-NTD-F                 | TGCCGCGCGGCAGCCATATGATT<br>GTAGGAAAAGTTCTTGAT                             | For construct the plasmids for                                                                                                 |             |

|                      |                                                          |                                                             |
|----------------------|----------------------------------------------------------|-------------------------------------------------------------|
| RsgI6-NTD-R          | <b>TGGTGGTGGTGGTGGCTCGAGTCA</b><br>ATTTTTAGGCTTGATTA     | expression of<br>proteins used in<br>ClpP protease<br>assay |
| RsgI6-NTD-<br>VAA1-F | <b>AAGAAGGAGATATACATATGATTG</b><br>TAGGAAAAGTTCTTGAT     |                                                             |
| RsgI6-NTD-<br>VAA1-R | <b>TGGTGGTGGTGGTGGCTCGAGTCA</b><br>TGCCGCAACCGGCAAATATC  |                                                             |
| RsgI6-NTD-<br>VAA2-F | <b>AAGAAGGAGATATACATATGATTG</b><br>TAGGAAAAGTTCTTGAT     |                                                             |
| RsgI6-NTD-<br>VAA2-R | <b>TGGTGGTGGTGGTGGCTCGAGTCA</b><br>TGCAGCAACTGCCGCAACCG  |                                                             |
| ClpP-F               | <b>AAGAAGGAGATATACATATGAGTT</b><br>TGGTACCGATAGT         |                                                             |
| ClpP-R               | <b>TGGTGGTGGTGGTGGCTCGAGTTT</b><br>TCTTCTTTCCATAACTTCG   |                                                             |
| ClpX-F               | <b>TGCCGCGCGGCAGCCATATGATA</b><br>CCAAAGCCCAGTGAAAT      |                                                             |
| ClpX-R               | <b>TGGTGGTGGTGGTGGCTCGAGTCA</b><br>ATTTATTATTACAGTCGGTGG |                                                             |
| ClpE-F               | <b>TGCCGCGCGGCAGCCATATGCCG</b><br>AAGAAGAAAAAGTATCT      |                                                             |
| ClpE-R               | <b>TGGTGGTGGTGGTGGCTCGAGTCA</b><br>CGGTTTTTCCACATTAAACA  |                                                             |
| ClpC-F               | <b>TGCCGCGCGGCAGCCATATGTAC</b><br>GGACGTTTTACCGAAAAAG    |                                                             |
| ClpC-R               | <b>TGGTGGTGGTGGTGGCTCGAGTTA</b><br>GCCCTTGTTTGAAACAAG    |                                                             |

<sup>a</sup> Restriction sites are underlined, and mutation sites are colored in red. Sequences of homology segments for seamless cloning are shown in bold. The targeted sequences in the Thermotargetron primers are indicated by lowercase letters. The HA or His tag is indicated by italics.



**Table S4.****NMR structural statistics of RsgI-PD.**

| Parameters                                   | RsgI1-PD<br>(PDB 8HEP) | RsgI2-PD<br>(PDB 8HEQ) | RsgI6-PD<br>(PDB 8HER) |
|----------------------------------------------|------------------------|------------------------|------------------------|
| NOE restraints                               |                        |                        |                        |
| Intra-residue                                | 1190                   | 1266                   | 1496                   |
| Sequential                                   | 767                    | 826                    | 903                    |
| Medium-range                                 | 423                    | 624                    | 600                    |
| Long-range                                   | 614                    | 809                    | 799                    |
| Ambiguous                                    | 1992                   | 2412                   | 2068                   |
| Total                                        | 4986                   | 5837                   | 5866                   |
| Number per residue                           | 28.32                  | 35.13                  | 33.32                  |
| Hydrogen bond restraints                     | 170                    | 168                    | 178                    |
| Torsion angle restraints                     |                        |                        |                        |
| Phi ( $\Phi$ ) angle restraints              | 149                    | 146                    | 155                    |
| Psi ( $\Psi$ ) angle restraints              | 149                    | 146                    | 155                    |
| Violations                                   |                        |                        |                        |
| Max. NOE violation ( $\text{\AA}$ )          | 0.185                  | 0.196                  | 0.193                  |
| Max. torsion angle violation ( $^{\circ}$ )  | 3.695                  | 3.201                  | 4.776                  |
| R.M.S.D from mean structure ( $\text{\AA}$ ) |                        |                        |                        |
| Backbone in regular secondary structure      | $0.45 \pm 0.07^a$      | $0.38 \pm 0.05^b$      | $0.37 \pm 0.06^c$      |
| Heavy atoms in regular secondary structure   | $0.81 \pm 0.06^a$      | $0.75 \pm 0.04^b$      | $0.70 \pm 0.04^c$      |
| Backbone for all residues <sup>d</sup>       | $0.63 \pm 0.07$        | $0.56 \pm 0.09$        | $0.69 \pm 0.14$        |
| Heavy atoms for all residues <sup>d</sup>    | $1.10 \pm 0.07$        | $0.90 \pm 0.07$        | $1.00 \pm 0.11$        |
| Ramachandran statistics                      |                        |                        |                        |
| Most favored region (%)                      | 89.6                   | 90.2                   | 92.0                   |
| Additionally allowed (%)                     | 9.5                    | 8.5                    | 7.2                    |
| Generously allowed (%)                       | 0.5                    | 0.7                    | 0.5                    |
| Disallowed (%)                               | 0.5                    | 0.7                    | 0.3                    |
| WHAT_CHECK Z-scores                          |                        |                        |                        |
| 1st generation packing quality               | 0.275                  | 0.662                  | 0.671                  |
| 2nd generation packing quality               | -0.883                 | -0.145                 | -0.667                 |
| Ramachandran plot appearance                 | -2.376                 | -2.836                 | -2.380                 |
| chi-1/chi-2 rotamer normality                | -3.369                 | -3.504                 | -2.656                 |
| Backbone conformation                        | 0.193                  | 0.680                  | 0.846                  |
| Inside/Outside distribution                  | 1.060                  | 0.965                  | 0.956                  |

<sup>a</sup> Residues for statistics include 3-9, 12-17, 23-28, 31-37, 47-61, 72-79, 90-108, 114-121, 123-132, 136-148, 154-159, 162-170.

<sup>b</sup> Residues for statistics include 3-8, 12-17, 22-28, 31-40, 45-60, 70-77, 88-105, 108-113, 116-125, 129-141, 147-152, 155-164.

<sup>c</sup> Residues for statistics include 3-9, 12-17, 23-28, 31-37, 47-61, 71-78, 89-110, 115-121, 123-131, 136-147, 154-159, 162-170.

<sup>d</sup> N- and C- terminal disordered residues are excluded.

Table S5.

**Crystallographic data collection and refinement statistics.**

| Parameter                                    | RsgI2-PD                                                                    |
|----------------------------------------------|-----------------------------------------------------------------------------|
| <b>PDB code</b>                              | 8HDJ                                                                        |
| <b>Crystallization</b>                       | 0.2 M Lithium sulfate monohydrate, pH 6.0, 20% w/v Polyethylene glycol 3350 |
| <b>Data collection<sup>a</sup></b>           |                                                                             |
| Space group                                  | C 1 2 1                                                                     |
| <i>a, b, c</i> (Å)                           | 75.09, 101.53, 86.36                                                        |
| $\alpha, \beta, \gamma$                      | 90.00, 92.93, 90.00                                                         |
| Wavelength                                   | 0.979                                                                       |
| Resolution (Å)                               | 24.84-1.85 (1.89-1.85)                                                      |
| Unique reflections                           | 54750 (3371)                                                                |
| Completeness (%)                             | 99.4 (99.6)                                                                 |
| Redundancy                                   | 3.1 (2.7)                                                                   |
| <i>Mean I/sigma (I)</i>                      | 9.3 (3.4)                                                                   |
| $R_{\text{merge}}^{\text{b}}$                | 0.070 (0.238)                                                               |
| <b>Refinement</b>                            |                                                                             |
| <i>R<sub>work</sub>/R<sub>free</sub></i> (%) | 0.2292/0.2445                                                               |
| <b>No. atoms</b>                             |                                                                             |
| Protein                                      | 4993                                                                        |
| Water                                        | 481                                                                         |
| <b>B-factors</b>                             |                                                                             |
| Average B-factor                             | 26.06                                                                       |
| Proteins                                     | 24.81                                                                       |
| Solvent                                      | 38.94                                                                       |
| <b>r.m.s.d.</b>                              |                                                                             |
| Bond length (Å)                              | 0.006                                                                       |
| Bond angles                                  | 1.05                                                                        |
| <b>Ramachandran statistics</b>               |                                                                             |
| Favored (%)                                  | 99.36                                                                       |
| Outliers (%)                                 | 0.00                                                                        |

a. Values in parentheses refer to data in the highest-resolution shell.

b.  $R_{\text{merge}} = \frac{\sum_{hkl} \sum_i |I(hkl)_i - \langle I(hkl) \rangle|}{\sum_{hkl} \sum_i \langle I(hkl) \rangle}$ , where  $I$  is the observed intensity,  $\langle I(hkl) \rangle$  represents the average intensity, and  $I(hkl)_i$  represents the observed intensity of each unique reflection.

**Table S6.****Relative intensity of Xyn10Z and Xyn11B to CipA in SDS-PAGE gel, determined by the Quantity One Software.**

| <b>Strain</b>                | <b>Xyn10Z</b> | <b>Xyn11B</b> |
|------------------------------|---------------|---------------|
| DSM1313                      | ND            | ND            |
| <i>ΔrsgI6</i>                | 1.93          | 0.28          |
| <i>ΔrsgI6::rsgI6-T3</i>      | 1.86          | 0.26          |
| <i>ΔrsgI6::rsgI6</i>         | 0.99          | ND            |
| <i>ΔrsgI6::rsgI6-T1</i>      | 0.44          | ND            |
| <i>ΔrsgI6::rsgI6-T2</i>      | 0.54          | ND            |
| <i>ΔrsgI6::rsgI6-T4</i>      | 0.39          | ND            |
| <i>ΔrsgI6::rsgI6-T5</i>      | 0.66          | ND            |
| <i>ΔrsgI6Δrsep</i>           | 2.03          | 0.26          |
| <i>ΔrsgI6Δrsep::rsgI6-T3</i> | 0.46          | ND            |

**Table S7.****Data values of Figs. 4D, 4E, 4F, and 5A.**

| <b>Relative expression values of Fig. 4D</b> |                                  |                                   |                                                  |                                                                 |                         |                         |                         |
|----------------------------------------------|----------------------------------|-----------------------------------|--------------------------------------------------|-----------------------------------------------------------------|-------------------------|-------------------------|-------------------------|
|                                              | $\Delta rsgl6$                   | :: <i>rsgl6</i> -<br>T3           | :: <i>rsgl6</i>                                  | :: <i>rsgl6</i> -<br>T1                                         | :: <i>rsgl6</i> -<br>T2 | :: <i>rsgl6</i> -<br>T4 | :: <i>rsgl6</i> -<br>T5 |
| <i>sigl6</i>                                 | 7.605                            | 7.765                             | 3.548                                            | 1.115                                                           | 2.474                   | 2.066                   | 1.317                   |
|                                              | 14.390                           | 8.676                             | 2.261                                            | 0.998                                                           | 2.341                   | 1.392                   | 2.579                   |
|                                              | 4.047                            | 5.645                             | 1.513                                            | 1.115                                                           | 2.230                   | 1.012                   | 1.544                   |
| AVERAGE                                      | 8.681                            | 7.362                             | 2.441                                            | 1.076                                                           | 2.348                   | 1.490                   | 1.813                   |
| STDEV                                        | 5.255                            | 1.555                             | 1.030                                            | 0.068                                                           | 0.122                   | 0.534                   | 0.673                   |
| <i>xyn10Z</i>                                | 10.273                           | 26.368                            | 1.694                                            | 4.230                                                           | 20.262                  | 8.698                   | 6.638                   |
|                                              | 27.488                           | 40.806                            | 8.116                                            | 1.694                                                           | 10.934                  | 6.547                   | 5.317                   |
|                                              | 15.356                           | 23.600                            | 4.143                                            | 2.950                                                           | 12.560                  | 3.607                   | 9.387                   |
| AVERAGE                                      | 17.705                           | 30.258                            | 4.651                                            | 2.958                                                           | 14.585                  | 6.284                   | 7.114                   |
| STDEV                                        | 8.845                            | 9.239                             | 3.241                                            | 1.268                                                           | 4.983                   | 2.556                   | 2.076                   |
| <i>xyn11B</i>                                | 377.598                          | 508.713                           | 14.327                                           | 30.289                                                          | 75.098                  | 46.874                  | 56.914                  |
|                                              | 855.550                          | 832.155                           | 101.175                                          | 13.839                                                          | 88.078                  | 48.527                  | 59.331                  |
|                                              | 337.960                          | 576.313                           | 66.289                                           | 24.263                                                          | 99.093                  | 31.357                  | 45.277                  |
| AVERAGE                                      | 523.703                          | 639.060                           | 60.597                                           | 22.797                                                          | 87.423                  | 42.252                  | 53.841                  |
| STDEV                                        | 288.071                          | 170.606                           | 43.703                                           | 8.322                                                           | 12.011                  | 9.472                   | 7.514                   |
| <i>xyn10D</i>                                | 26.085                           | 121.528                           | 5.408                                            | 19.095                                                          | 38.993                  | 47.675                  | 33.478                  |
|                                              | 204.385                          | 193.360                           | 39.812                                           | 6.612                                                           | 49.356                  | 36.131                  | 28.152                  |
|                                              | 66.494                           | 132.069                           | 20.045                                           | 14.076                                                          | 58.694                  | 18.317                  | 34.900                  |
| AVERAGE                                      | 98.988                           | 148.986                           | 21.755                                           | 13.261                                                          | 49.014                  | 34.041                  | 32.177                  |
| STDEV                                        | 93.486                           | 38.789                            | 17.266                                           | 6.281                                                           | 9.855                   | 14.790                  | 3.557                   |
| <i>cel9K</i>                                 | 0.678                            | 0.476                             | 1.173                                            | 0.570                                                           | 0.940                   | 1.181                   | 1.338                   |
|                                              | 1.173                            | 0.763                             | 0.664                                            | 1.548                                                           | 0.683                   | 1.338                   | 0.993                   |
|                                              | 1.424                            | 0.448                             | 0.732                                            | 2.014                                                           | 0.624                   | 1.214                   | 1.197                   |
| AVERAGE                                      | 1.092                            | 0.562                             | 0.856                                            | 1.377                                                           | 0.749                   | 1.244                   | 1.176                   |
| STDEV                                        | 0.379                            | 0.175                             | 0.276                                            | 0.737                                                           | 0.168                   | 0.083                   | 0.173                   |
| <b>Relative expression values of Fig. 4E</b> |                                  |                                   |                                                  |                                                                 |                         |                         |                         |
|                                              | $\Delta sigl6$ -<br><i>rsgl6</i> | :: <i>sigl6</i> -<br><i>rsgl6</i> | :: <i>sigl6</i> -<br><i>rsgl6</i><br><i>P95A</i> | :: <i>sigl6</i> -<br><i>rsgl6</i><br><i>N94A</i><br><i>P95A</i> |                         |                         |                         |
| <i>sigl6</i>                                 | 0.010                            | 1.157                             | 0.330                                            | 0.047                                                           |                         |                         |                         |
|                                              | 0.028                            | 1.057                             | 0.188                                            | 0.054                                                           |                         |                         |                         |
|                                              | 0.018                            | 0.518                             | 0.204                                            | 0.086                                                           |                         |                         |                         |
| AVERAGE                                      | 0.019                            | 0.910                             | 0.241                                            | 0.062                                                           |                         |                         |                         |
| STDEV                                        | 0.009                            | 0.344                             | 0.078                                            | 0.021                                                           |                         |                         |                         |
| <i>xyn10Z</i>                                | 0.631                            | 1.725                             | 0.479                                            | 0.354                                                           |                         |                         |                         |
|                                              | 0.614                            | 1.019                             | 0.251                                            | 0.331                                                           |                         |                         |                         |

|               |       |       |       |       |
|---------------|-------|-------|-------|-------|
|               | 0.649 | 0.677 | 0.485 | 0.280 |
| AVERAGE       | 0.632 | 1.140 | 0.405 | 0.322 |
| STDEV         | 0.018 | 0.535 | 0.133 | 0.038 |
| <i>xyn11B</i> | 0.056 | 0.620 | 0.102 | 0.084 |
|               | 0.046 | 0.603 | 0.082 | 0.086 |
|               | 0.030 | 0.376 | 0.140 | 0.062 |
| AVERAGE       | 0.044 | 0.533 | 0.108 | 0.077 |
| STDEV         | 0.013 | 0.136 | 0.029 | 0.013 |
| <i>xyn10D</i> | 0.761 | 4.459 | 1.941 | 0.394 |
|               | 0.839 | 4.982 | 0.557 | 0.691 |
|               | 0.456 | 2.229 | 1.786 | 0.645 |
| AVERAGE       | 0.685 | 3.890 | 1.428 | 0.577 |
| STDEV         | 0.203 | 1.462 | 0.758 | 0.160 |
| <i>cel9K</i>  | 3.060 | 2.119 | 2.591 | 0.727 |
|               | 3.418 | 2.664 | 3.715 | 0.525 |
|               | 3.741 | 2.075 | 3.038 | 0.366 |
| AVERAGE       | 3.406 | 2.286 | 3.115 | 0.539 |
| STDEV         | 0.341 | 0.328 | 0.566 | 0.181 |

#### Relative xylanase values of Fig. 4F

|         | $\Delta sigI6$ -<br><i>rsgI6</i> | :: <i>sigI6</i> -<br><i>rsgI6</i> | :: <i>sigI6</i> -<br><i>rsgI6</i><br><i>P95A</i> | :: <i>sigI6</i> -<br><i>rsgI6</i><br><i>N94A</i><br><i>P95A</i> |
|---------|----------------------------------|-----------------------------------|--------------------------------------------------|-----------------------------------------------------------------|
|         | 31.177                           | 86.051                            | 49.201                                           | 47.467                                                          |
|         | 16.818                           | 94.565                            | 34.972                                           | 52.237                                                          |
|         | 18.199                           | 110.528                           | 34.038                                           | 26.688                                                          |
|         | 27.232                           | 84.352                            | 49.322                                           |                                                                 |
| AVERAGE | 23.356                           | 93.874                            | 41.883                                           | 42.131                                                          |
| STDEV   | 6.965                            | 11.968                            | 8.528                                            | 13.585                                                          |

#### Relative expression values of Fig. 5A

|               | $\Delta rsgI6$<br>(1) | 1:: <i>rsgI6</i><br>-T3 | $\Delta rsgI6$<br>$\Delta rseP(2)$ | 2:: <i>rsgI6</i><br>-T3 |
|---------------|-----------------------|-------------------------|------------------------------------|-------------------------|
| <i>sigI6</i>  | 7.605                 | 7.765                   | 2.842                              | 0.597                   |
|               | 14.390                | 8.676                   | 1.655                              | 1.123                   |
|               | 4.047                 | 5.645                   | 2.634                              | 1.170                   |
| AVERAGE       | 8.681                 | 7.362                   | 2.377                              | 0.964                   |
| STDEV         | 5.255                 | 1.555                   | 0.634                              | 0.318                   |
| <i>xyn10Z</i> | 10.273                | 26.368                  | 26.736                             | 1.415                   |
|               | 27.488                | 40.806                  | 11.638                             | 2.190                   |
|               | 15.356                | 23.600                  | 25.826                             | 4.996                   |
| AVERAGE       | 17.705                | 30.258                  | 21.400                             | 2.867                   |
| STDEV         | 8.845                 | 9.239                   | 8.467                              | 1.884                   |
| <i>xyn11B</i> | 377.598               | 508.713                 | 739.655                            | 16.921                  |

|               |         |         |         |         |
|---------------|---------|---------|---------|---------|
|               | 855.550 | 832.155 | 257.907 | 35.278  |
|               | 337.960 | 576.313 | 568.378 | 117.842 |
| AVERAGE       | 523.703 | 639.060 | 521.980 | 56.680  |
| STDEV         | 288.071 | 170.606 | 244.202 | 53.757  |
| <hr/>         |         |         |         |         |
| <i>xyn10D</i> | 26.085  | 121.528 | 86.531  | 4.485   |
|               | 204.385 | 193.360 | 50.743  | 10.162  |
|               | 66.494  | 132.069 | 110.289 | 22.708  |
| AVERAGE       | 98.988  | 148.986 | 82.521  | 12.452  |
| STDEV         | 93.486  | 38.789  | 29.975  | 9.325   |
| <hr/>         |         |         |         |         |
| <i>cel9K</i>  | 0.678   | 0.476   | 2.645   | 1.341   |
|               | 1.173   | 0.763   | 1.427   | 2.537   |
|               | 1.424   | 0.448   | 1.721   | 1.782   |
| AVERAGE       | 1.092   | 0.562   | 1.931   | 1.887   |
| STDEV         | 0.379   | 0.175   | 0.635   | 0.605   |
| <hr/>         |         |         |         |         |
